# Supplementary material for: Investigating an indirect aviation effect on mid-latitude cirrus clouds – linking lidar-derived optical properties to in situ measurements
Source: Copernicus journal article supplement (doi:10.5194/acp-23-8369-2023), 2023-07-26
Supplement: Supplementary file 1 [file acp-23-8369-2023-supplement.pdf]

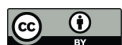

*Supplement of*

## **Investigating an indirect aviation effect on mid-latitude cirrus clouds – linking lidar-derived optical properties to in situ measurements**

**Silke Groß et al.**

*Correspondence to:* Silke Groß ([silke.gross@dlr.de](mailto:silke.gross@dlr.de))

The copyright of individual parts of the supplement might differ from the article licence.

The significance test was done with the Mann-whitney U test method. This method is a non-parametric test for unpaired samples with no assumptions of their distributions (different from Student T test).

$P=1$  means the two datasets are identical and  $p < 5\%$  ( $h=1$ ) indicates both datasets are significantly different

**Results:**

Comparison  $D_{\text{eff}}$  of 26 March and 7 April 2014:  $p = 0.0027346$ ,  $h=1$

Comparison  $N_{\text{par}}$  of 26 March and 7 April 2014:  $p = 0.0$ ,  $h=1$

Comparison  $D_{\text{eff}}$  of 26 March and 7 April 2014:  $p = 0.0$ ,  $h=1$

Comparison  $N_{\text{par}}$  of 26 March and 7 April 2014:  $p = 0.11445$ ,  $h=1$

Comparison  $D_{\text{eff}}$  all:  $p=0.21896$ ,  $h=1$

Compariosn  $N_{\text{par}}$  all:  $p=0.055504$ ,  $h=1$

Comparison  $D_{\text{eff}}$  T = [210-215]:  $p=5.68e^{-6}$ ,  $h=1$

Compariosn  $N_{\text{par}}$  T = [210-215]:  $p=4.37e^{-8}$ ,  $h=1$

| Temperature/K | p-value for $D_{\text{eff}}$ | p-value for $N_{\text{par}}$ |
|---------------|------------------------------|------------------------------|
| 208           | 0.000089346771183            | 0.203500586807082            |
| 209           | 0.000000000079685            | 0.000000000007271            |
| 210           | 0.247314327354255            | 0.000000398791608            |
| 211           | 0.000147928141202            | 0                            |
| 212           | 0.004225973629796            | 0.125582277030740            |
| 213           | 0.399044916857030            | 0.079586093204909            |
| 214           | 0.175375892497683            | 0.160126851351188            |
| 215           | 0.466861486969759            | 0.020467446677696            |
| 216           | 0.381986850641420            | 0.223630929883747            |
| 217           | 0.436158517018589            | 0.460791042628778            |
